# Supplementary material for: A versatile gold cross-linked nanoparticle based on triblock copolymer as the carrier of doxorubicin
Source: Royal Society of Chemistry journal article supplement (doi:10.1039/c5ra14044g), 2015-01-01
Supplement: c5ra14044g1.pdf [file c5ra14044g1.pdf]

(Electronic Supplementary Information for *RSC advances*)

**A versatile gold cross-linked nanoparticle based on triblock copolymer  
as the carrier of doxorubicin**

Sangmin Jeon,<sup>‡a</sup> Hyewon Ko,<sup>‡b</sup> Vijayakameswara Rao N,<sup>a</sup> Hong Yeol Yoon,<sup>a</sup>

Dong Gil You,<sup>a</sup> Hwa Seung Han,<sup>a</sup> Wooram Um,<sup>b</sup> Gurusamy Saravanakumar,<sup>a</sup> and Jae Hyung  
Park<sup>\*ab</sup>

<sup>a</sup>School of Chemical Engineering, College of Engineering, Sungkyunkwan University,  
Suwon 440-746, Republic of Korea

<sup>b</sup>Department of Health Sciences and Technology, SAIHST, Sungkyunkwan University,  
Suwon 440-746, Republic of Korea

<sup>‡</sup>These authors contributed equally to this work

\*Corresponding author:

Jae Hyung Park, Ph.D.

School of Chemical Engineering

College of Engineering

Sungkyunkwan University, Suwon 440-746, Republic of Korea

Tel: +82-31-290-7288; fax: +82-31-299-6857; e-mail: [jhpark1@skku.edu](mailto:jhpark1@skku.edu)

**Table S1.** Reaction conditions of PCL-Br, PCL-*b*-PDMAEMA-Br and PCL-*b*-PDMAEMA-*b*-PEG.

| Sample                                | Reaction        | Monomer        | Solvent        | Catalyst                                    | Time | $M_n^a$             |
|---------------------------------------|-----------------|----------------|----------------|---------------------------------------------|------|---------------------|
|                                       |                 |                |                |                                             | h    | g mol <sup>-1</sup> |
| PCL-Br                                | ROP             | $\epsilon$ -CL | Toluene        | Sn(Oct) <sub>2</sub>                        | 24   | 6964.8              |
| PCL- <i>b</i> -PDMAEMA-Br             | ATRP            | DMAEMA         | DMF<br>Toluene | CuBr <sub>2</sub> /<br>Me <sub>6</sub> TREN | 6    | 9071.9              |
| PCL- <i>b</i> -PDMAEMA- <i>b</i> -PEG | Click chemistry | -              | THF            | CuBr/<br>PMDETA                             | 24   | 14071.9             |

<sup>a</sup> Molecular weight ( $M_n$ ) was determined by <sup>1</sup>H-NMR.

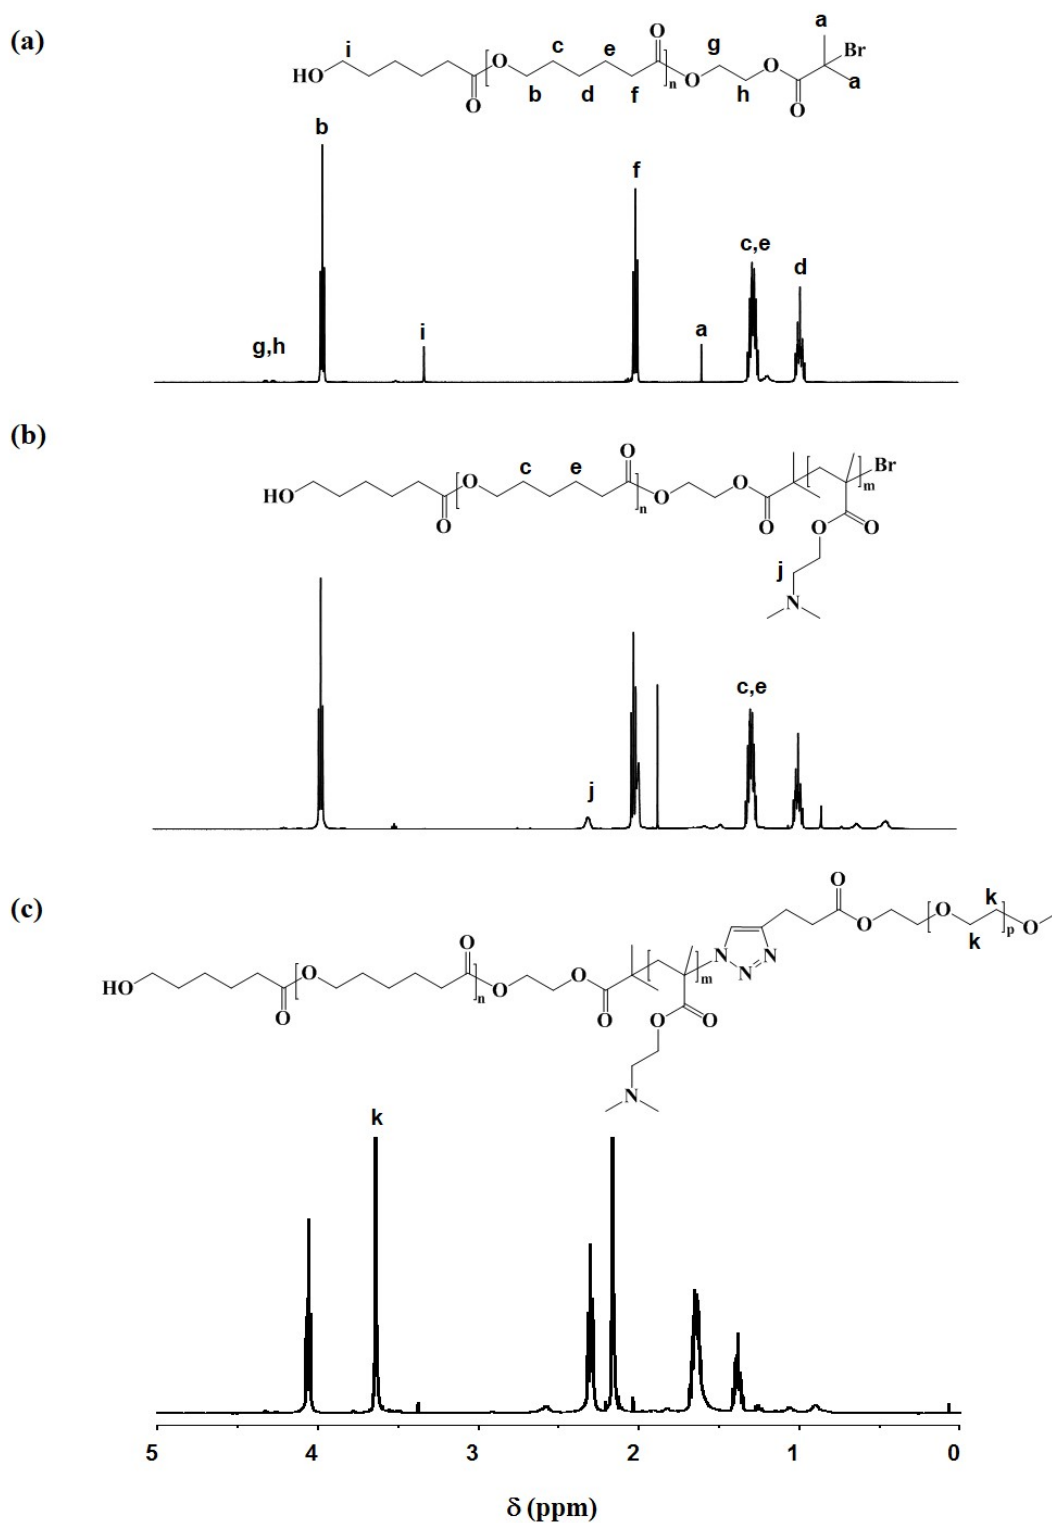

**Fig. S1.**  $^1\text{H}$ -NMR spectrum of PCL-Br (a) PCL-*b*-PDMAEMA-Br (b) and PCL-*b*-PDMAEMA-*b*-PEG (c) in  $\text{CDCl}_3$ .

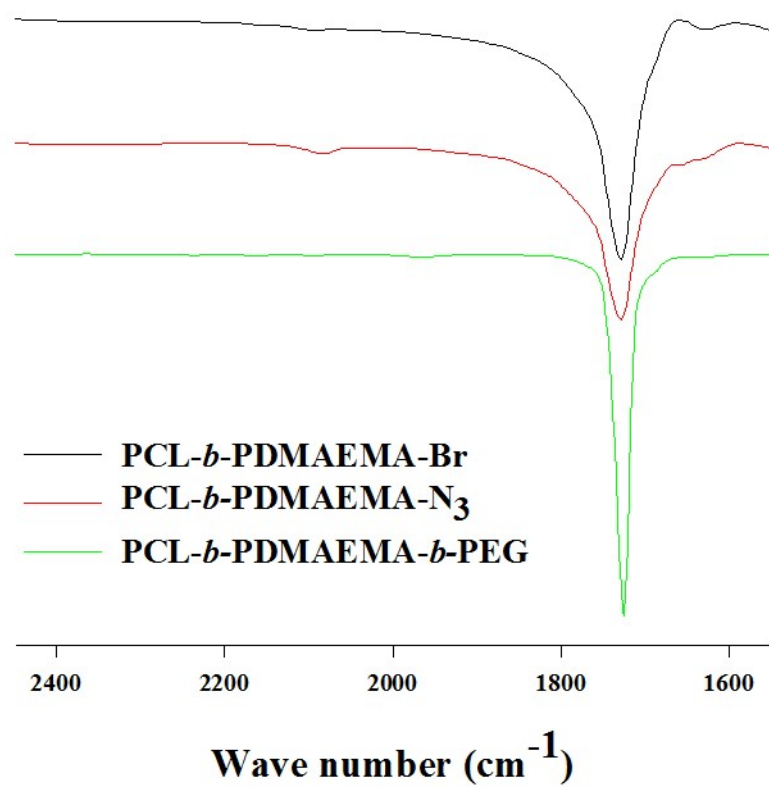

**Fig. S2.** FT-IR spectra.

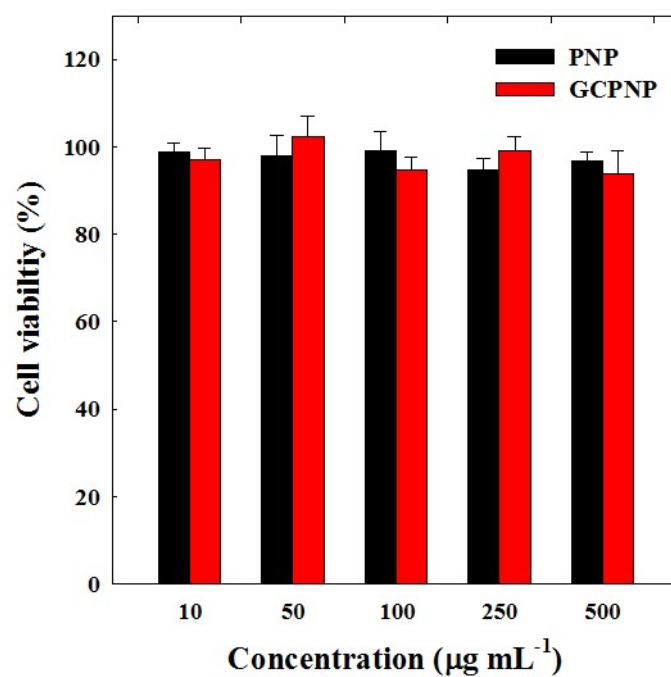

**Fig. S3.** Cytotoxicity of bare PNPs and GCPNPs with various concentrations after 24h. The error bars in the graph represent standard deviations ( $n=5$ ).
